# Supplementary material for: Immune response to COVID‐19 vaccination is attenuated by poor disease control and antimyeloma therapy with vaccine driven divergent T‐cell response
Source: PubMed Central journal article supplement (PMC9306522; doi:10.1111/bjh.18066), 2022-02-17
Supplement: BJH-197-293-s002.pdf [file BJH-197-293-s002.pdf]

## Supplementary Figures

### Supplementary Figures and legends

|                                |                                                                                                                                                                                                                                                                                                                                                                                                                                |
|--------------------------------|--------------------------------------------------------------------------------------------------------------------------------------------------------------------------------------------------------------------------------------------------------------------------------------------------------------------------------------------------------------------------------------------------------------------------------|
| Supplementary Figure 1         | Post vaccination S and N protein antibody levels                                                                                                                                                                                                                                                                                                                                                                               |
| Supplementary Figure 2         | Relationship between Anti-S concentration after second vaccine dose and serological evidence of past COVID infection<br><i>Legend: Kruskal Wallis test <math>p &lt; 0.001</math></i>                                                                                                                                                                                                                                           |
| Supplementary Figure 3         | Relationship between Anti-S antibody concentration after 1st vs 2nd vaccine dose (n=74)                                                                                                                                                                                                                                                                                                                                        |
| Supplementary Figure 4a        | Relationship between Anti-S concentration after second vaccine dose and age<br><i>Legend: Lowess line shown. Spearman rho -0.15, <math>p = 0.021</math></i>                                                                                                                                                                                                                                                                    |
| Supplementary Figure 4b        | Comparison of Anti-S antibody after second vaccine dose by type of Vaccine<br><i>Legend: Comparison of Anti-S values &lt; 50 IU/ml, using Fischer exact test, <math>p = 0.39</math><br/>Kruskal-Wallis <math>p = 0.018</math></i>                                                                                                                                                                                              |
| Supplementary Figure 5a and 5b | Relationship between Anti-S concentration and a) time from second vaccine; b) interval between vaccine doses<br><i>Legend: (a) Dash-lines represents Lowess line with 0.8 bandwidth, Solid red line, threshold of 50 IU/ml. Spearman's rho = -0.12, <math>p = 0.002</math>. (b) Dash-lines represents Lowess line with 0.8 bandwidth, Solid red line, threshold of 50 IU/ml. Spearman's rho = 0.085, <math>p = 0.22</math></i> |
| Supplementary Figure 6         | Visual representation of T-spot and humoral responses post vaccination                                                                                                                                                                                                                                                                                                                                                         |

Supplementary Figure 1. Post vaccination S and N protein antibody levels

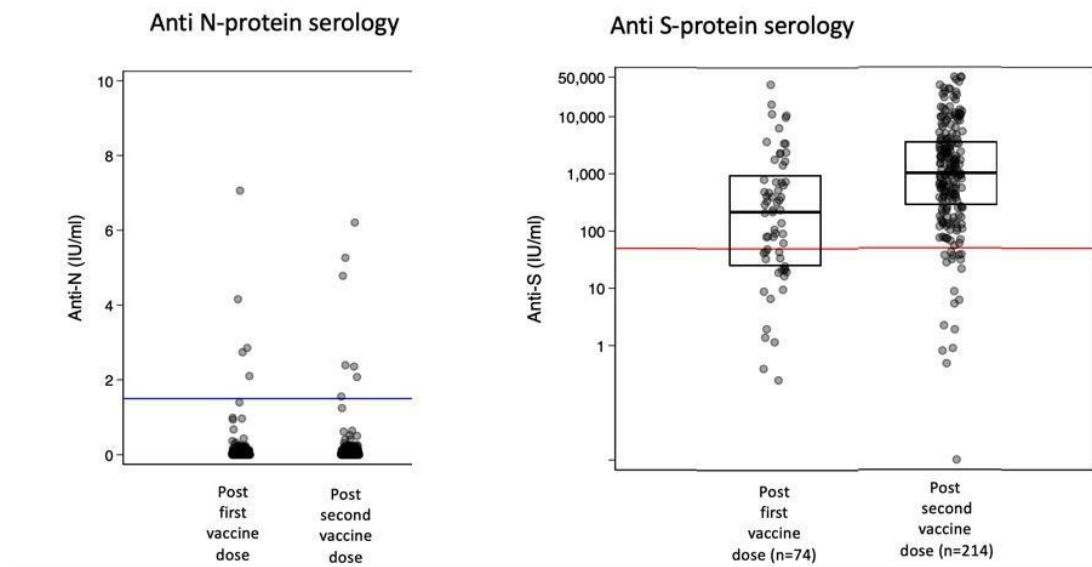

Supplementary Figure 2. Relationship between Anti-S concentration after second vaccine dose and serological evidence of past COVID infection

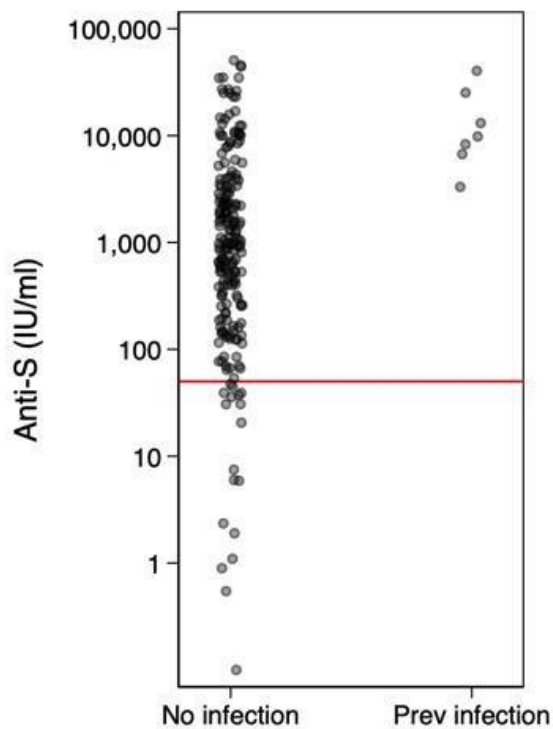

Legend: Kruskal Wallis test  $p < 0.0011$

**Supplementary Figure 3. Relationship between Anti-S antibody concentration after 1st vs 2nd vaccine dose (n=74)**

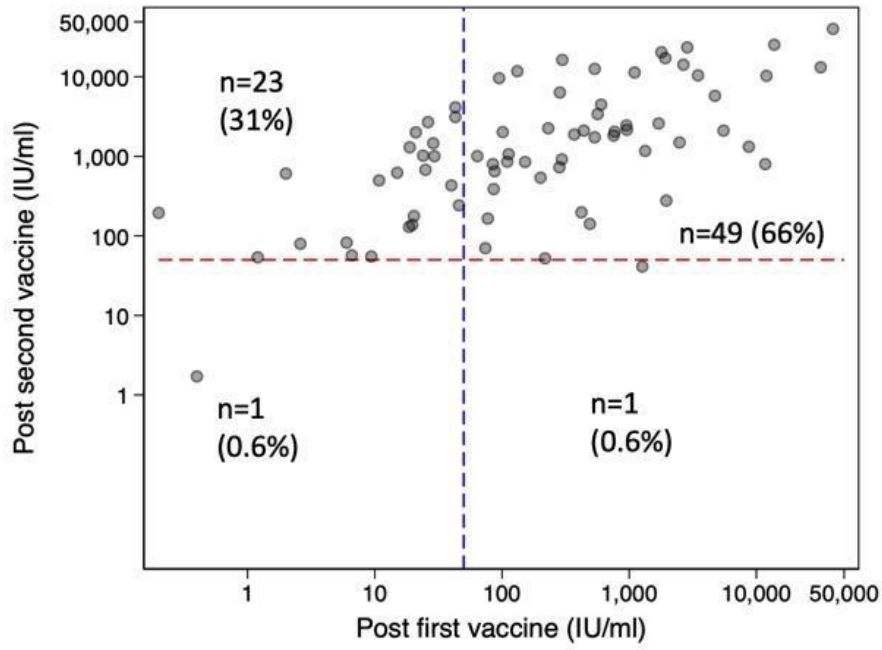

Supplementary Figure 4a. Relationship between Anti-S concentration after second vaccine dose and age

Legend: Lowess line shown. Spearman rho -0.15, p=0.021

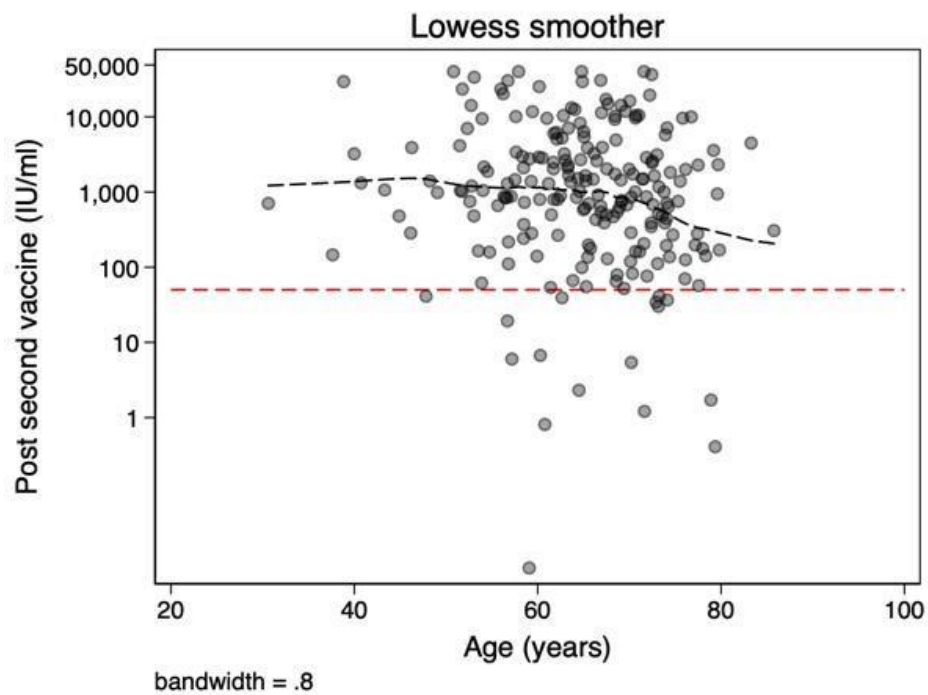

Supplementary Figure 4b. Comparison of Anti-S antibody after second vaccine dose by type of Vaccine

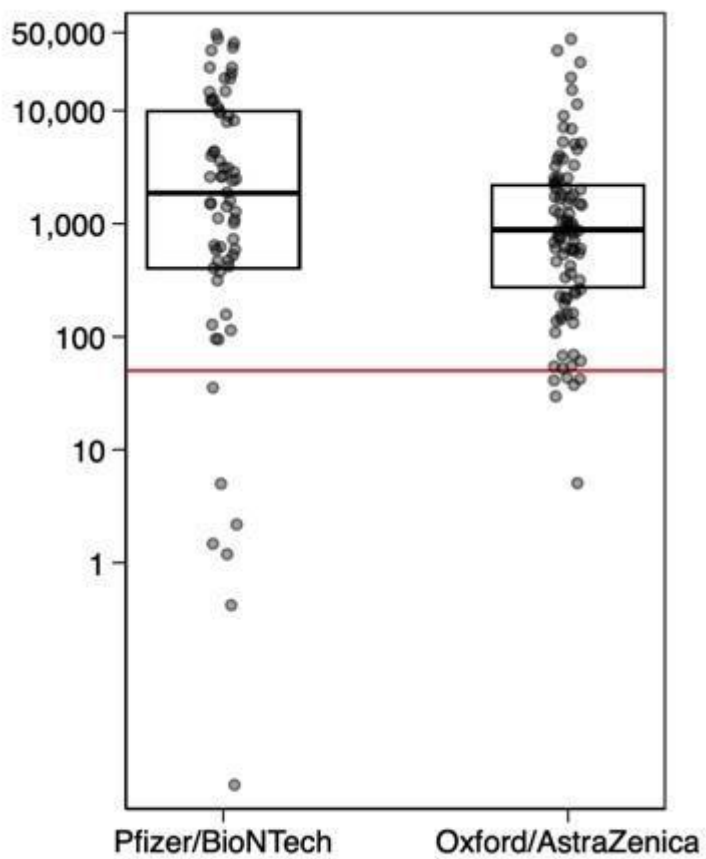

Legend: Comparison of Anti-S values < 50 IU/ml, using Fischer exact test,  $p=0.39$  Kruskal-Wallis  $p=0.018$

Supplementary figure 5a and 5b. Relationship between Anti-S concentration and a) time from second vaccine; b) interval between vaccine doses

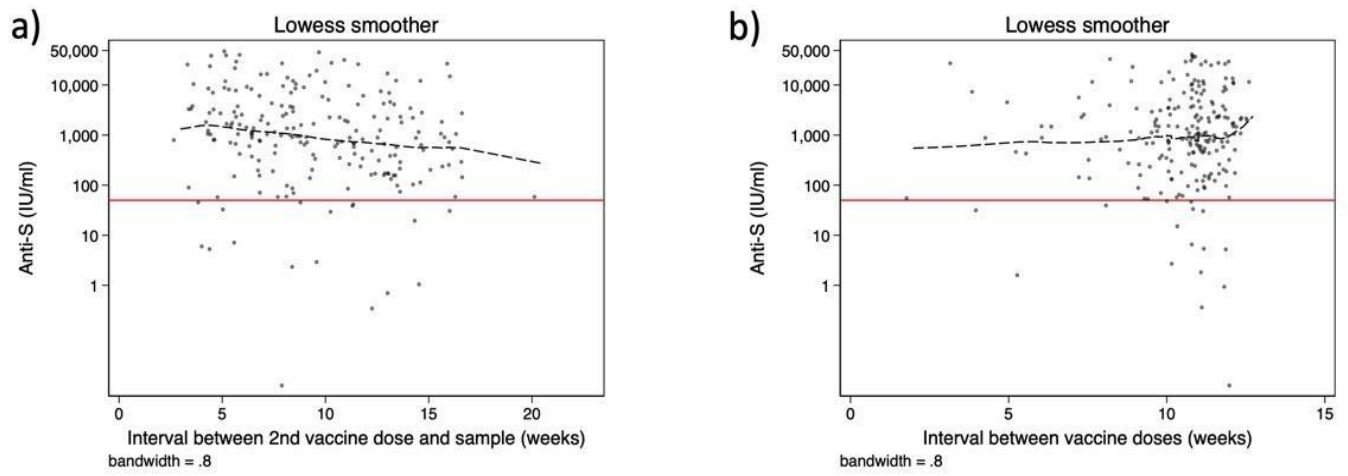

Legend: (a) Dash-lines represents Lowess line with 0.8 bandwidth, Solid red line, threshold of 50 IU/ml. Spearman's rho= -0.12, p=0.002. (b) Dash-lines represents Lowess line with 0.8 bandwidth, Solid red line, threshold of 50 IU/ml. Spearman's rho= 0.085, p=0.22

**Supplementary Figure 6. Visual representation of T-spot and humoral responses post vaccination**

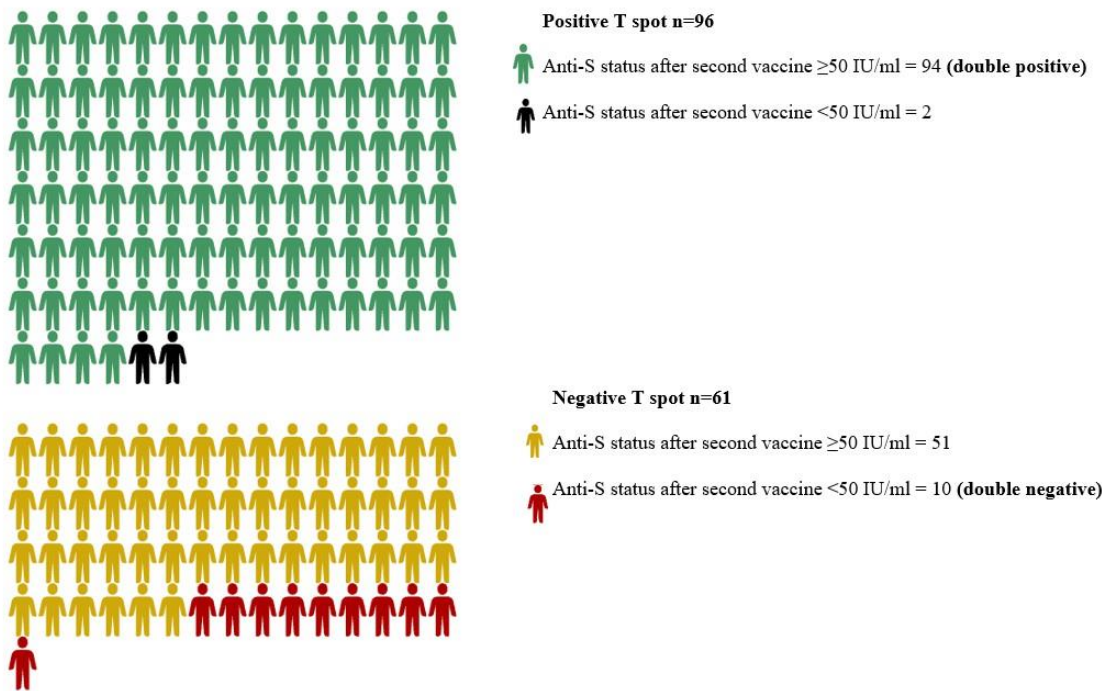

**Supplementary Tables**

**Supplementary Tables and Legends**

|                       |                                                                                                                                                                                                                                                                                                                                                                                                                                                                                                                                          |
|-----------------------|------------------------------------------------------------------------------------------------------------------------------------------------------------------------------------------------------------------------------------------------------------------------------------------------------------------------------------------------------------------------------------------------------------------------------------------------------------------------------------------------------------------------------------------|
| Supplementary Table 1 | <p>Supplementary Table 1. Relationship between IGRA reactivity and Myeloma status and Chemotherapy</p> <p><i>Legend: CR/VGPR – Complete remission/ Very good partial remission. PR/Stable – Partial remission/ Stable disease. Other chemotherapy included proteasome inhibitors - ixazomib, carfilzomib, bortezomib; immunomodulatory drugs - thalidomide, lenalidomide, pomalidomide; belantamab, bendamustine, cyclophosphamide, dexamethasone, other steroids. bendamustine, cyclophosphamide, dexamethasone, other steroids</i></p> |
|-----------------------|------------------------------------------------------------------------------------------------------------------------------------------------------------------------------------------------------------------------------------------------------------------------------------------------------------------------------------------------------------------------------------------------------------------------------------------------------------------------------------------------------------------------------------------|

**Supplementary Table 1. Relationship between IGRA reactivity and Myeloma status and Chemotherapy**

|          |      | Myeloma status (p=0.003) |            |                       |      | Chemotherapy type (p=0.24) |            |            |
|----------|------|--------------------------|------------|-----------------------|------|----------------------------|------------|------------|
|          |      | CR/VGPR                  | PR/Stable  | Progressive / Relapse |      | No therapy                 | CD38/BCM A | Other      |
| T spot   |      | n=76                     | n=42       | n=22                  |      | n=34                       | n=24       | n=36       |
| Negative | n=55 | 20 (26.3%)               | 23 (54.8%) | 12 (54.6%)            | n=37 | 12 (35.3%)                 | 13 (54.2%) | 12 (33.3%) |
| Positive | n=85 | 56 (73.7%)               | 19 (45.2%) | 10 (45.5%)            | n=57 | 22 (64.7%)                 | 11 (45.8%) | 24 (66.7%) |

Legend: CR/VGPR – Complete remission/ Very good partial remission. PR/Stable – Partial remission/ Stable disease. Other chemotherapy included proteasome inhibitors - ixazomib, carfilzomib, bortezomib; immunomodulatory drugs - thalidomide, lenalidomide, pomalidomide; belantamab, bendamustine, cyclophosphamide, dexamethasone, other steroids. bendamustine, cyclophosphamide, dexamethasone, other steroids
